# Supplementary material
Source: PubMed Central journal article supplement (PMC6275552)
Supplement: NIHMS881437-supplement.pdf [file NIHMS881437-supplement.pdf]

**Protein tyrosine phosphatase  $\sigma$  regulates immune cell functions and autoimmune encephalomyelitis development**

***Yosuke Ohtake, Weimin Kong, Rashad Hussain, Makoto Horiuchi, Michel L. Tremblay, Doina Ganea and Shuxin Li***

## A. Thymus

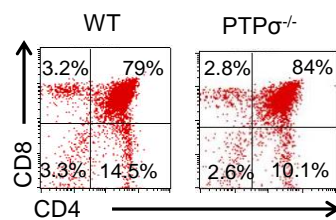

|                     | CD4+      | CD8+      | Double negative | Double positive |
|---------------------|-----------|-----------|-----------------|-----------------|
| WT                  | 13.4±1.8% | 4.2±1.1%  | 3.6±0.3%        | 79.0±1.0%       |
| PTPσ <sup>-/-</sup> | 9.8±0.3%* | 2.5±0.3%* | 2.5±0.5%*       | 84.9±1.0%*      |

## B. Spleen

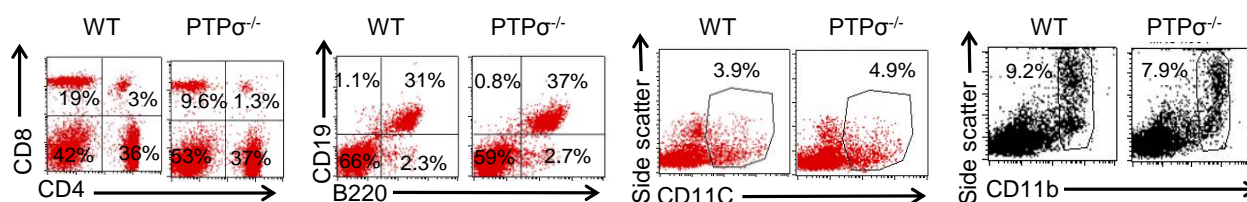

|                     | CD4+      | CD8+      | B cell    | CD11b    | CD11c    |
|---------------------|-----------|-----------|-----------|----------|----------|
| WT                  | 32.6±2.9% | 16.2±2.5% | 31.4±1.1% | 7.1±1.8% | 3.8±1.0% |
| PTPσ <sup>-/-</sup> | 32.6±4.0% | 9.8±0.3%* | 39.0±2.8% | 6.7±1.1% | 4.5±1.1% |

**Supplemental figure 1: Characterization by flow cytometry of cell profiles in thymuses (A) and spleens (B) of WT and PTPσ<sup>-/-</sup> mice (n=4 mice/group).**

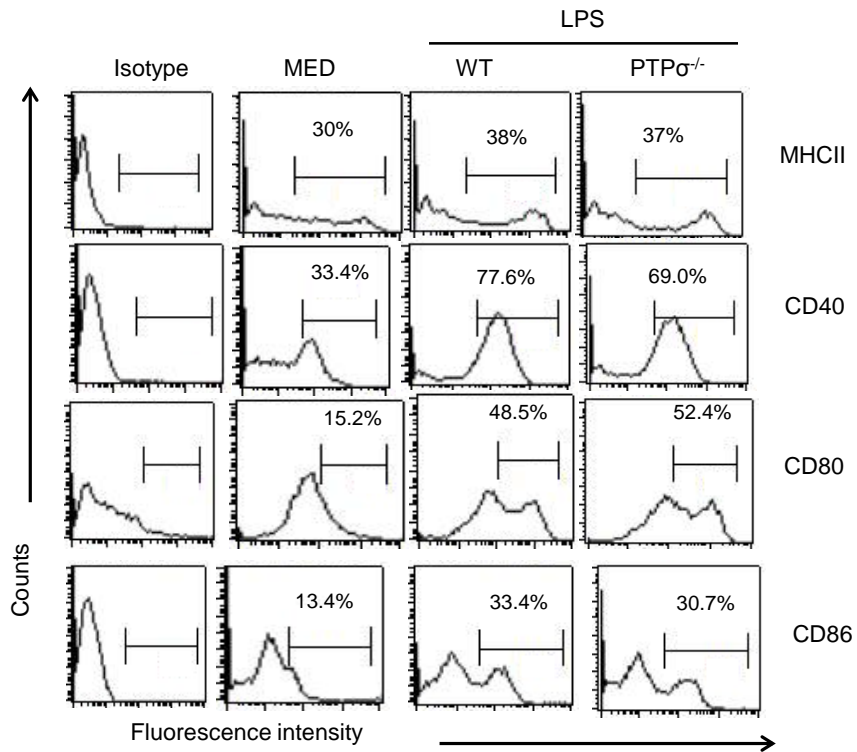

**Supplemental figure 2: Comparison by flow cytometry of surface marker expression in dendritic cells (DCs).** Bone marrow from WT and PTP $\sigma^{-/-}$  mice was cultured in the presence of GM-CSF for 7 days to generate DCs. DCs were treated with medium (MED, as a negative control) or LPS for 24 hours, then stained with fluorescence conjugated anti MHCII, CD40, CD80, and CD86. ISO: isotype antibody as a negative staining control.

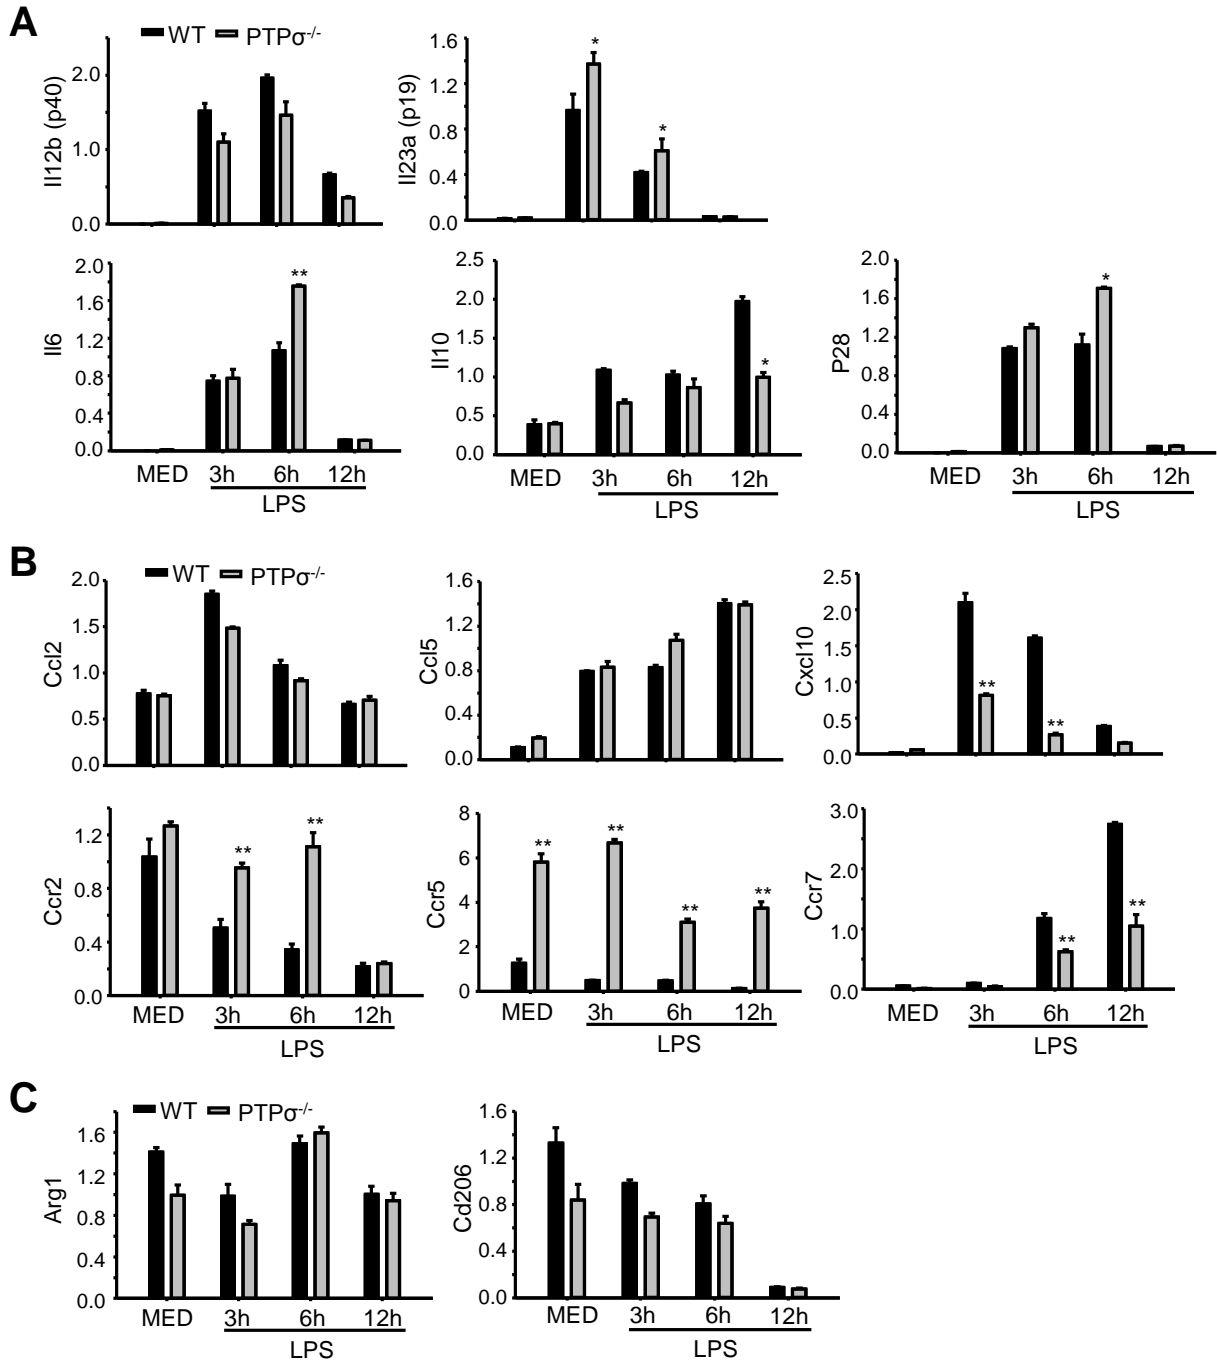

**Supplemental figure 3: RT-PCR assays show expression levels of cytokines (A), chemokines and their receptors (B), and M1/M2 markers (C) in bone marrow derived macrophages treated with LPS for 3, 6 or 12 hours.**
